# Supplementary material
Source: PubMed Central journal article supplement (PMC8928571)
Supplement: NIHMS1781977-supplement-1.pdf [file NIHMS1781977-supplement-1.pdf]

**Supplemental Exhibit 1.** Characteristics of Cities/Towns in Massachusetts by Proportion Black or Latino Population.

| Characteristics                               | % Black Non-Latino Population |                      |         | % Latino Population |                      |         |
|-----------------------------------------------|-------------------------------|----------------------|---------|---------------------|----------------------|---------|
|                                               | Bottom Quartile               | Top Quartile         | p-value | Bottom Quartile     | Top Quartile         | p-value |
| <b>Demographic variables</b>                  |                               |                      |         |                     |                      |         |
| Total Population (mean, standard deviation)   | 12,264<br>(7,516)             | 178,415<br>(239,038) | 0.002   | 11,447<br>(5,978)   | 179,388<br>(240,985) | 0.001   |
| Age (mean, standard deviation)                | 45.9 (3.4)                    | 37.0 (5.4)           | <0.001  | 45.9 (4.3)          | 36.4 (4.7)           | <0.001  |
| Proportion above age 60y (%)                  | 26.6                          | 20.2                 | <0.001  | 26.8                | 19.5                 | <0.001  |
| Gender (% male)                               | 48.8                          | 48.6                 | 0.559   | 48.9                | 48.6                 | 0.581   |
| Race/Ethnicity (%)                            |                               |                      |         |                     |                      |         |
| Latino                                        | 2.1                           | 15.3                 | <0.001  | 1.1                 | 18.7                 | <0.001  |
| Black (non-Latino)                            | 0.2                           | 11.1                 | <0.001  | 1.0                 | 10.5                 | <0.001  |
| White (non-Latino)                            | 93.5                          | 61.7                 | <0.001  | 94.2                | 60.2                 | <0.001  |
| Other (non-Latino)                            | 4.2                           | 11.9                 | <0.001  | 3.9                 | 10.6                 | <0.001  |
| No. of persons per household (mean, S.D.)     | 2.6 (0.2)                     | 2.5 (0.2)            | 0.014   | 2.6 (0.3)           | 2.5 (0.2)            | 0.027   |
| Foreign-born Non-citizens (%)                 | 1.9                           | 10.7                 | <0.001  | 1.8                 | 10.8                 | <0.001  |
| <b>Economic and occupational variables</b>    |                               |                      |         |                     |                      |         |
| Education level (% <HS education)             | 5.1                           | 12.2                 | <0.001  | 5.1                 | 13.5                 | <0.001  |
| Median household income (\$)                  | 103,210                       | 73,506               | <0.001  | 99,334              | 67,550               | <0.001  |
| Occupation in Essential Services (%)          | 38.4                          | 42.5                 | 0.102   | 39.5                | 44.1                 | 0.068   |
| Food and services Preparation                 | 4.5                           | 6.2                  | <0.001  | 4.5                 | 6.3                  | <0.001  |
| Construction and extraction services          | 4.7                           | 4.3                  | 0.383   | 5.3                 | 4.3                  | <0.001  |
| Installation/maintenance & repair services    | 2.6                           | 2.0                  | 0.013   | 2.7                 | 2.0                  | 0.003   |
| Material moving Occupation                    | 2.1                           | 2.7                  | 0.048   | 2.3                 | 3.0                  | 0.059   |
| Production services                           | 3.6                           | 4.2                  | 0.319   | 3.6                 | 5.0                  | 0.046   |
| Transportation services                       | 2.8                           | 3.1                  | 0.371   | 2.7                 | 3.4                  | 0.089   |
| Building/grounds/maintenance services         | 2.6                           | 3.9                  | 0.002   | 2.8                 | 4.2                  | 0.002   |
| Healthcare practitioners & technical services | 2.0                           | 1.9                  | 0.643   | 1.8                 | 1.9                  | 0.641   |
| Healthcare support Services                   | 2.5                           | 4.2                  | 0.002   | 2.7                 | 4.6                  | 0.001   |
| Personal care and Service occupation          | 2.5                           | 3.2                  | 0.001   | 2.6                 | 3.2                  | 0.002   |
| Protective services                           | 2.2                           | 2.1                  | 0.690   | 2.3                 | 2.1                  | 0.160   |

Source: Authors' analysis of Massachusetts Department of Public Health Data 2020 and American Community Survey 2018. Notes: N/A.

**Supplemental Exhibit 2.** Proportion Black non-Latino Population and Number of COVID-19 Cases per 100,000 Population Across Massachusetts Cities and Towns.

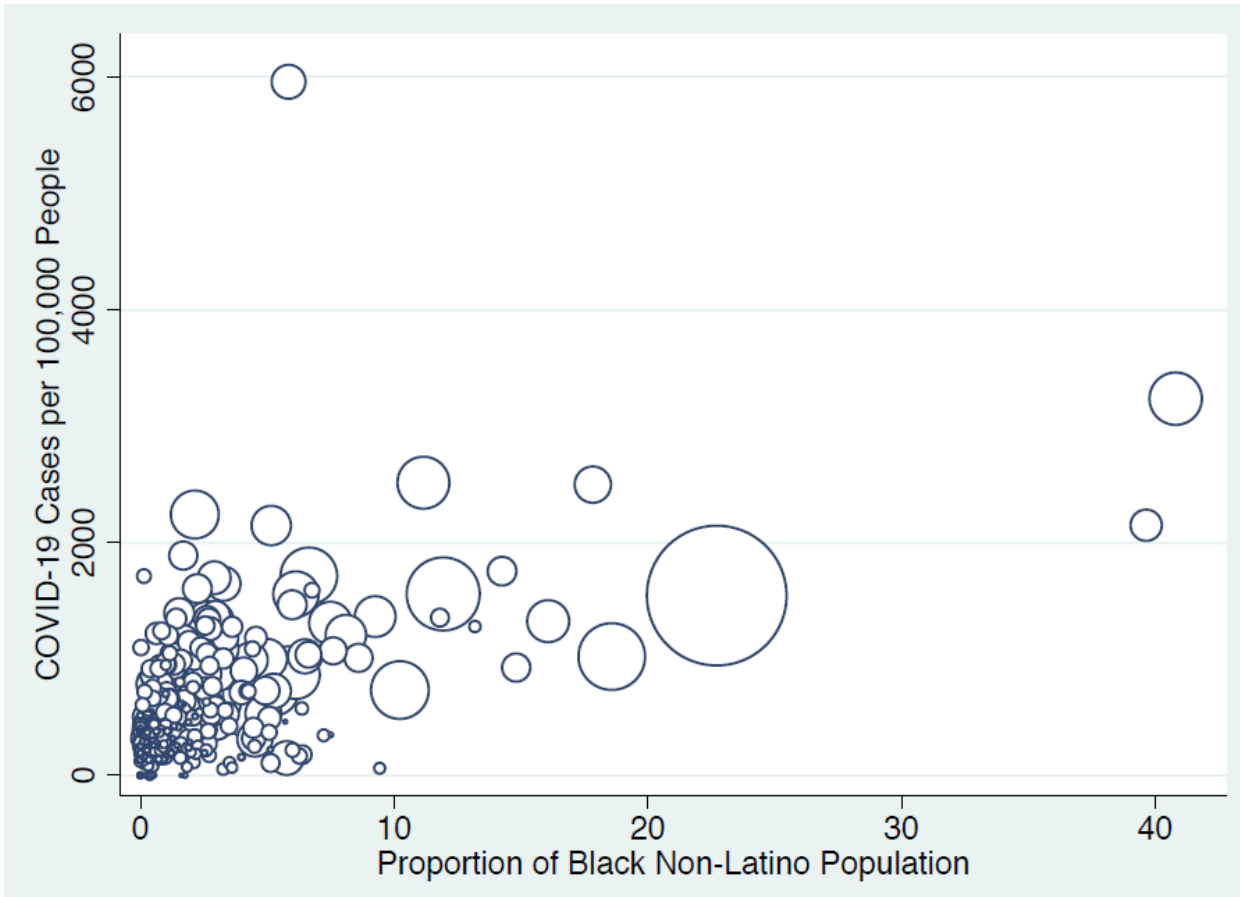

Source: Authors' analysis of Massachusetts Department of Public Health Data 2020 and American Community Survey 2018. Notes: Figure shows the relationship between proportion Black non-Latinos residing in a town or city and COVID-19 case rates. The size of each circle reflects the total population of each town or city.

**Supplemental Exhibit 3.** Proportion Latino Population and Number of COVID-19 Cases per 100,000 Population Across Massachusetts Cities and Towns.

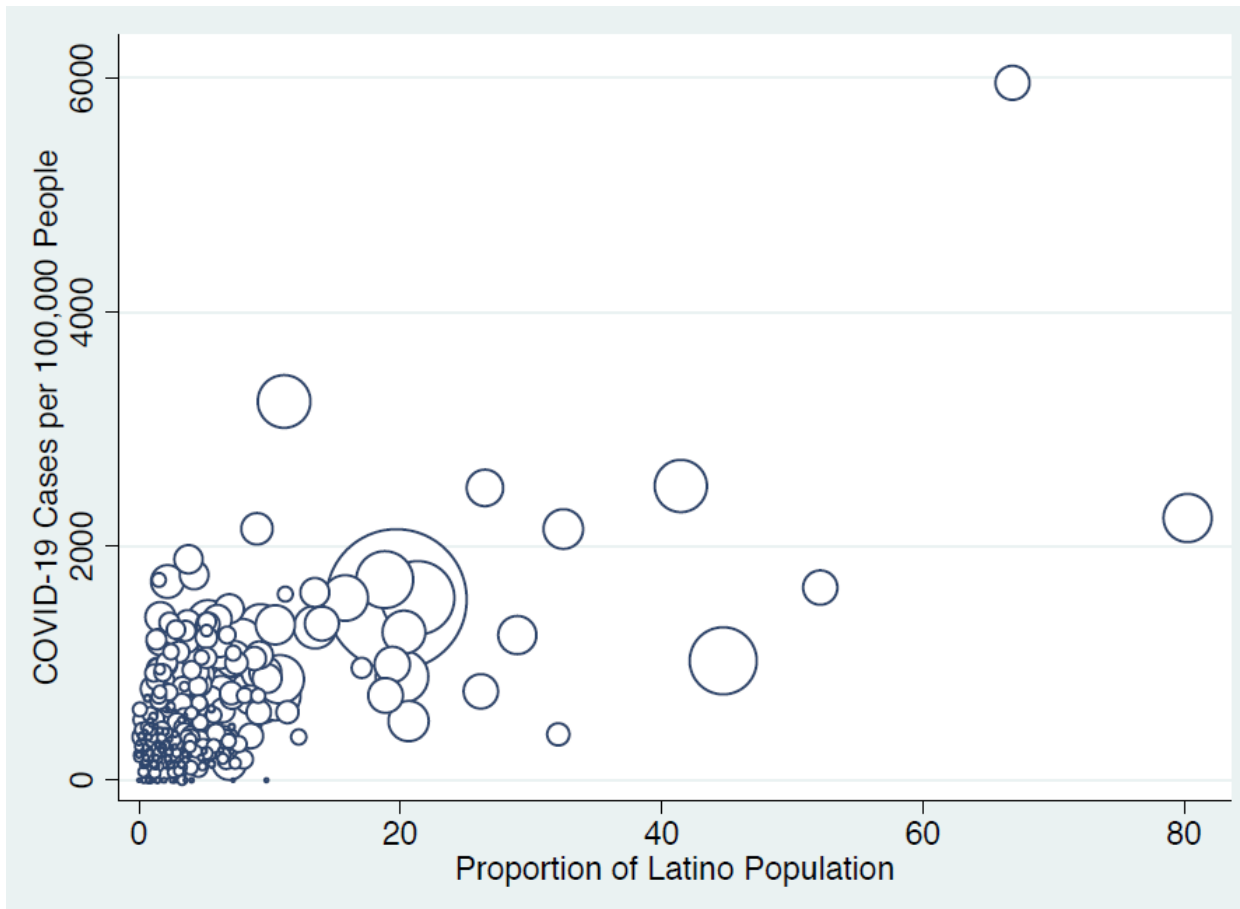

Source: Authors' analysis of Massachusetts Department of Public Health Data 2020 and American Community Survey 2018. Notes: Figure shows the relationship between proportion of Latinos residing in a town or city and COVID-19 case rates. The size of each circle reflects the total population of each town or city.

**Supplemental Exhibit 4.** Association of Race/Ethnicity, Demographic, Economic, and Occupational Factors with COVID-19 Case Rates across Massachusetts Cities and Towns.

| City/town variable                             | Increases in cases per 100,000 people |                     |                                     |                  |                                                    |                 |                      |
|------------------------------------------------|---------------------------------------|---------------------|-------------------------------------|------------------|----------------------------------------------------|-----------------|----------------------|
|                                                | Univariate Analyses <sup>a</sup>      |                     | Multivariable Analysis <sup>a</sup> |                  | Multivariable Analysis using Z-scores <sup>b</sup> |                 | P-value <sup>d</sup> |
|                                                | Estimate                              | 95% CI <sup>c</sup> | Estimate                            | 95% CI           | Estimate                                           | 95% CI          |                      |
| Proportion of Black non-Latino Population      | 312.3                                 | 241.9 to 383.0      | 307.2                               | 219.6 to 394.7   | 127.2                                              | 90.9 to 163.4   | <0.001               |
| Proportion of Latino Population                | 258.2                                 | 217.0 to 300.3      | 50.4                                | -19.0 to 119.8   | 40.6                                               | -15.3 to 96.5   | 0.154                |
| Proportion of Other Non-Latino Population      | 86.5                                  | 7.2 to 169.9        | -216.4                              | -321.4 to -111.3 | -122.4                                             | -181.8 to -63.0 | <0.001               |
| City/town population size                      | 11.5                                  | 7.9 to 15.2         | -4.0                                | -7.8 to -0.24    | -16.8                                              | -32.6 to -1.0   | 0.037                |
| Age, Proportion age >60 years                  | -546.6                                | -666.6 to -426.4    | 163.9                               | 37.8 to 290.1    | 122.5                                              | 28.2 to 216.8   | 0.011                |
| Average Household size (per 1 person increase) | 669.4                                 | 344.0 to 994.8      | 886.2                               | 494.3 to 1278.1  | 236.4                                              | 131.9 to 340.9  | <0.001               |
| Proportion with < HS education                 | 611.9                                 | 524.0 to 699.8      | 57.7                                | -115.1 to 230.5  | 27.1                                               | -54.0 to 108.1  | 0.512                |
| Median income                                  | -87.1                                 | -109.6 to 64.6      | -23.7                               | -69.8 to 22.7    | -70.4                                              | -208.8 to 67.9  | 0.317                |
| Proportion of essential workers                | 247.1                                 | 185.3 to 309.0      | 0.23                                | -120.2 to 125.6  | 2.8                                                | -124.3 to 129.9 | 0.966                |
| Proportion of foreign-born non-citizens        | 749.3                                 | 658.8 to 839.8      | 791.7                               | 587.9 to 851.6   | 310.4                                              | 253.5 to 367.2  | <0.001               |

Source: Authors' analysis of Massachusetts Department of Public Health Data 2020 and American Community Survey 2018.

**Notes:**

a) For univariate and multivariate analyses

-changes in case rates reflect a per 10 percentage point increase in the following variables: Proportion Black, Latino, Other non-Latino population, age over 60 years, people with less than a high school education, essential workers, and foreign-born non-citizens

-For city/town population size, changes in case rates reflect a per 10,000 people increase

-For average household size, changes in case rates reflect a per 1 person increase

-For median income, changes in case rates reflect a per \$10,000 increase

b) Adjusted z-scores reflect changes in case rates per 1 standard deviation increase for all town/city variables

c) P-values for all univariate analyses were <0.001

d) Adjusted p-values are for both the multivariate analysis and the adjusted Z-score analysis
